# Supplementary material for: Low abundance of the matrix arm of complex I in mitochondria predicts longevity in mice
Source: PubMed Central journal article supplement — Nat Commun. 2014 May 12;5:3837. doi: 10.1038/ncomms4837 (PMC4024759; doi:10.1038/ncomms4837), 2014-05-12
Supplement: ncomms4837-s1.pdf [file ncomms4837-s1.pdf]

### Supplementary Figures

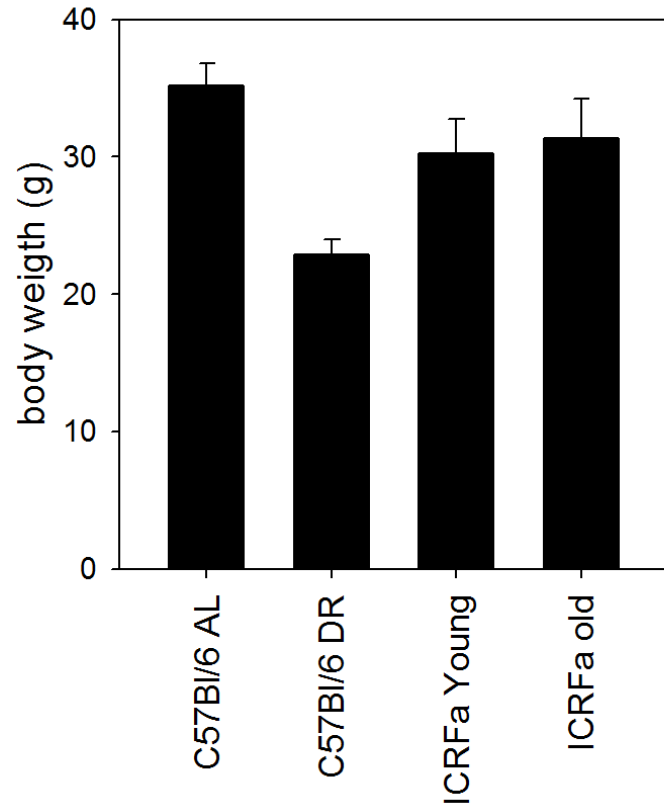

**Supplementary Fig. 1: Body weights of the animals used for mitochondrial proteomics.** Data are mean  $\pm$  SD, n=3. DR animals weigh less ( $p < 0.05$ , ANOVA), while weights of all other animals are not different.

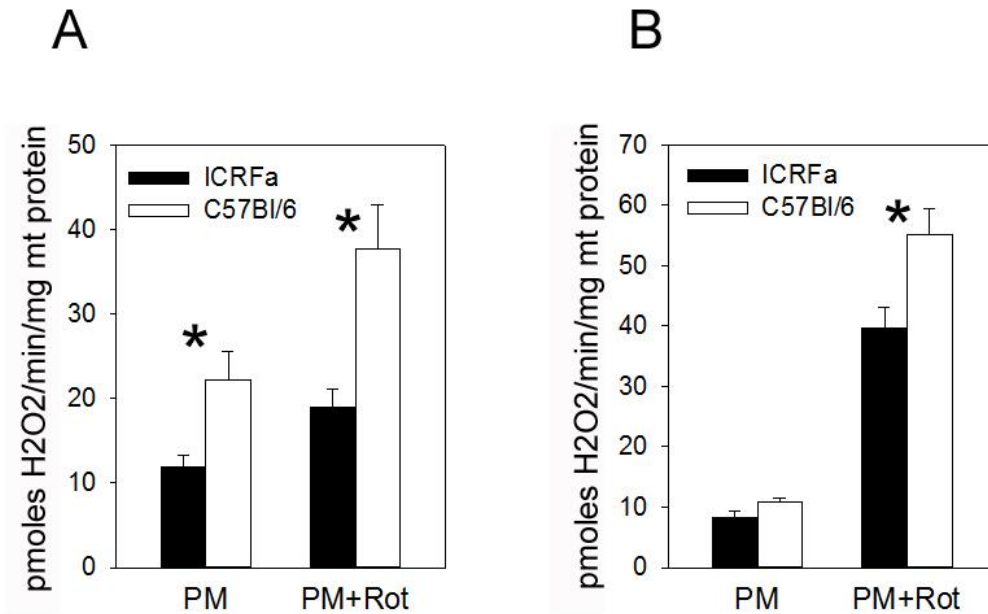

**Supplementary Fig. 2: Lower ROS production from complex I in long-lived ICRFa mice.** H<sub>2</sub>O<sub>2</sub> release from purified liver (A) and brain (B) mitochondria from ICRFa and C57Bl/6 mice at 8-10 months of age. Data are mean  $\pm$  SEM, n = 5 (liver) or 4 (brain). \* indicates p < 0.05, t test. PM: basal conditions (pyruvate+malate), PM+Rot: Pyruvate/malate plus rotenone, indicating maximum ROS production from complex I.

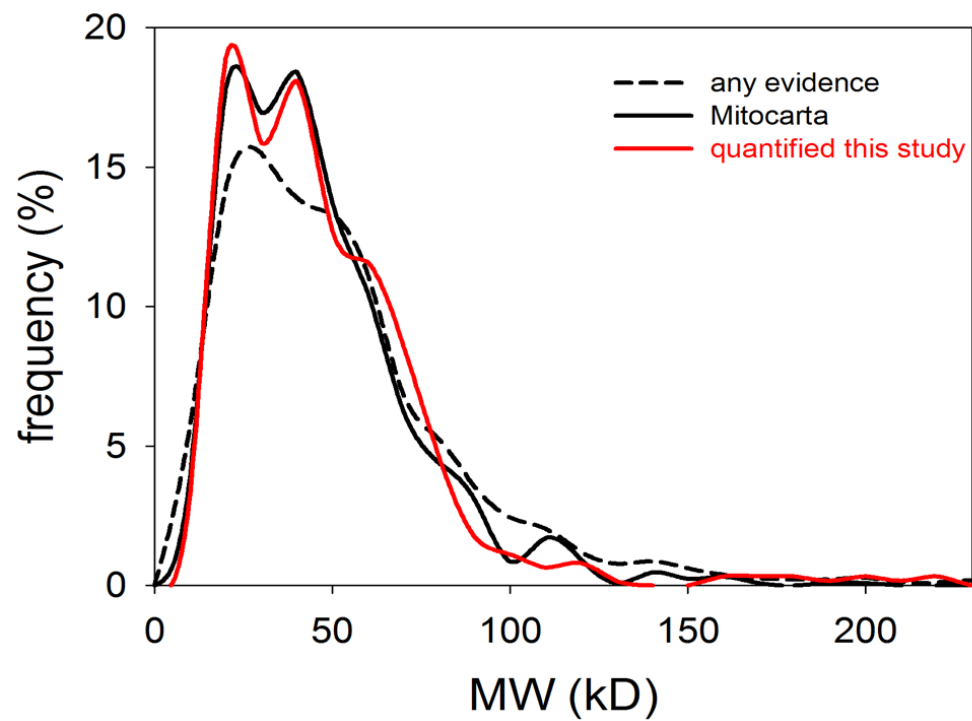

**Supplementary Fig. 3: Molecular weight distributions of mitochondrial proteins.** Red: proteins quantified in this study, black: all mouse proteins in Mitocarta, broken line: all mouse proteins with any evidence for mitochondrial localisation in MitoMiner.

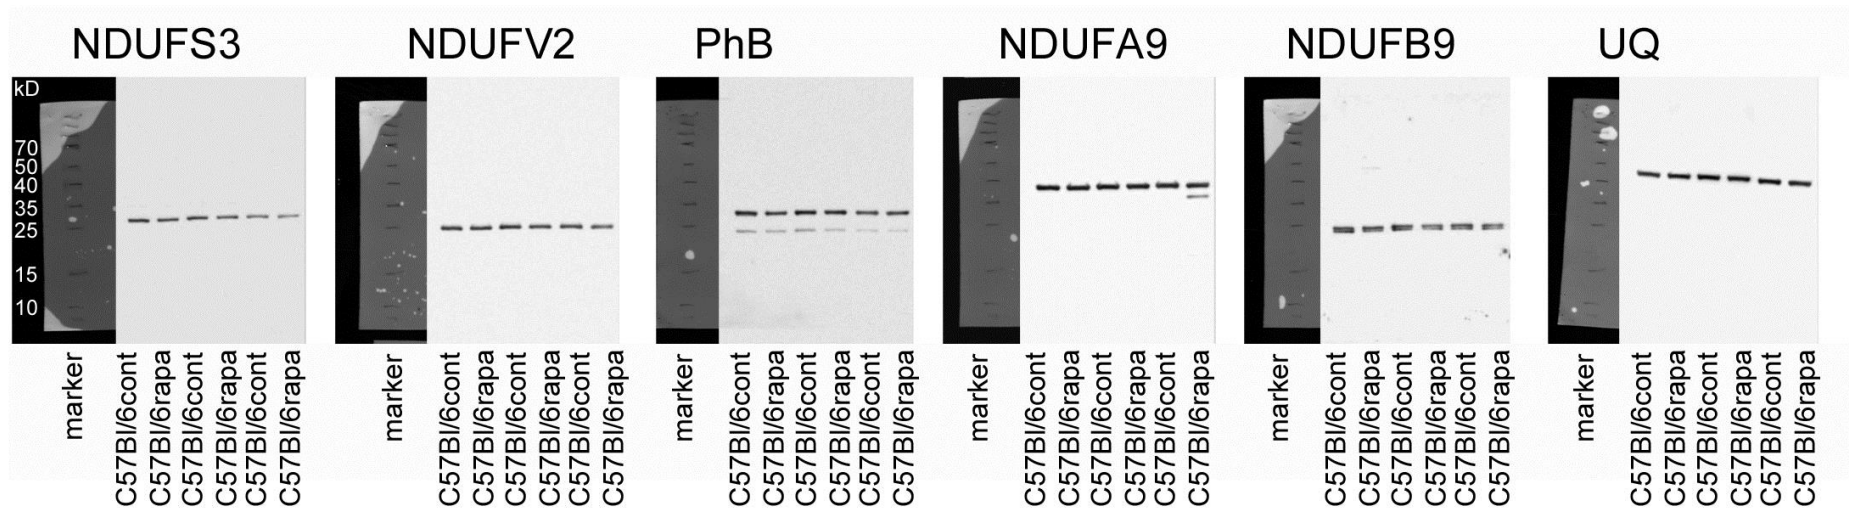

**Supplementary Fig. 4: Full SDS-PAGE Western blots of complex I matrix arm subunits NDUF33 and NDUFV2, prohibitin (PhB), membrane arm subunits NDUFA9 and NDUF9 and UQCRC2 (UQ) in liver mitochondria from control and rapamycin-treated C57Bl/6 mice. Marker positions are shown on the left.**

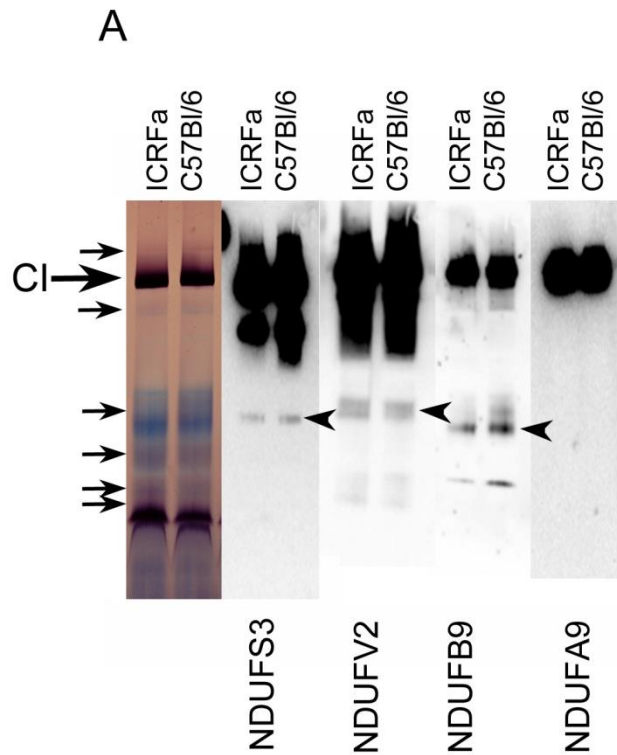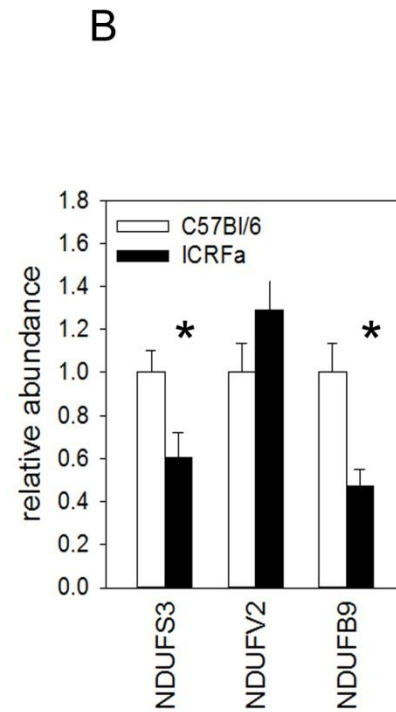

**Supplementary Fig. 5: Assembly of complex I is more complete in long-lived mice. A)** Complex I activity and blue native gels/Western blots of the indicated subunits of complex I in mice liver mitochondria from 8 months old ICRFa and C57Bl/6 mice. Same blots as in Fig. 5C but over-exposed. Arrowheads mark the position of the bands quantified in Fig. S4B. **B)** Ratio of lower/holo-complex band intensity of the indicated complex I subunits on blue native gel Westerns. Data are mean  $\pm$  SEM, 3 animals/group. \* indicates  $p < 0.05$ , t test.

A

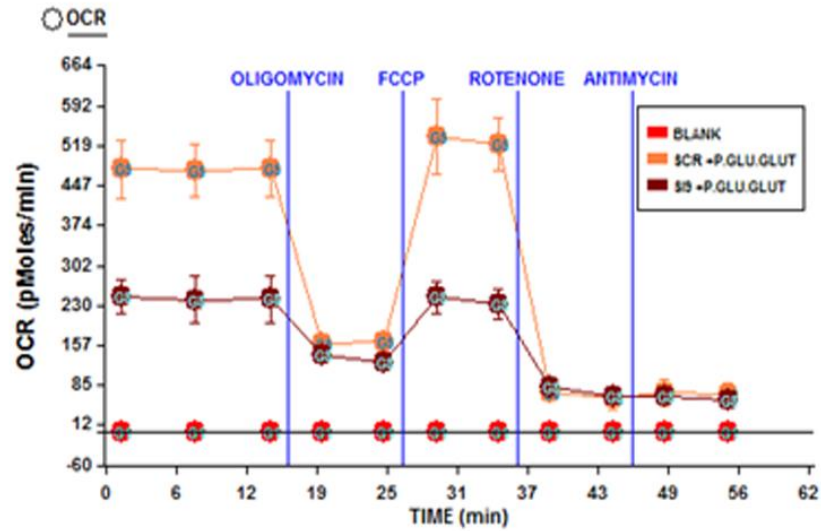

B

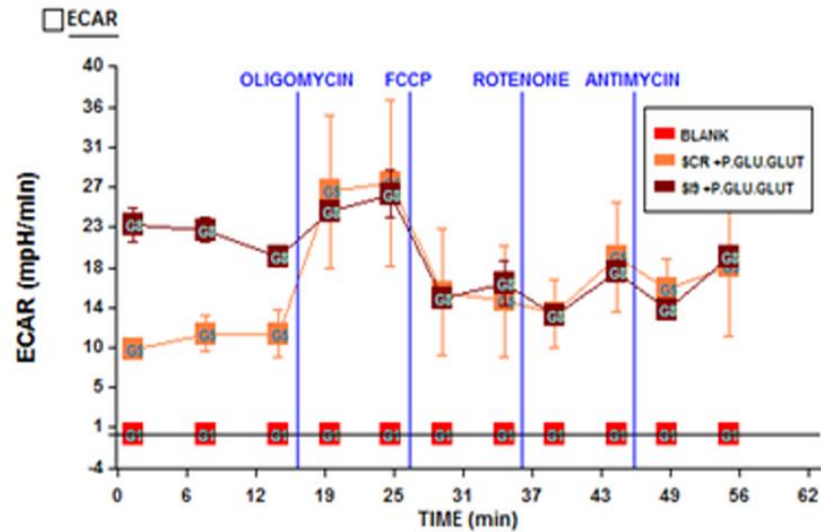

Supplementary Fig. 6: Oxygen consumption (A) and medium acidification (B) by HeLa cells transfected with anti-NDUF4F1 siRNA (brown) or scrambled control siRNA (orange). Data are mean  $\pm$  SD from 4 wells per condition with 35,000 cells each. Red: blank.

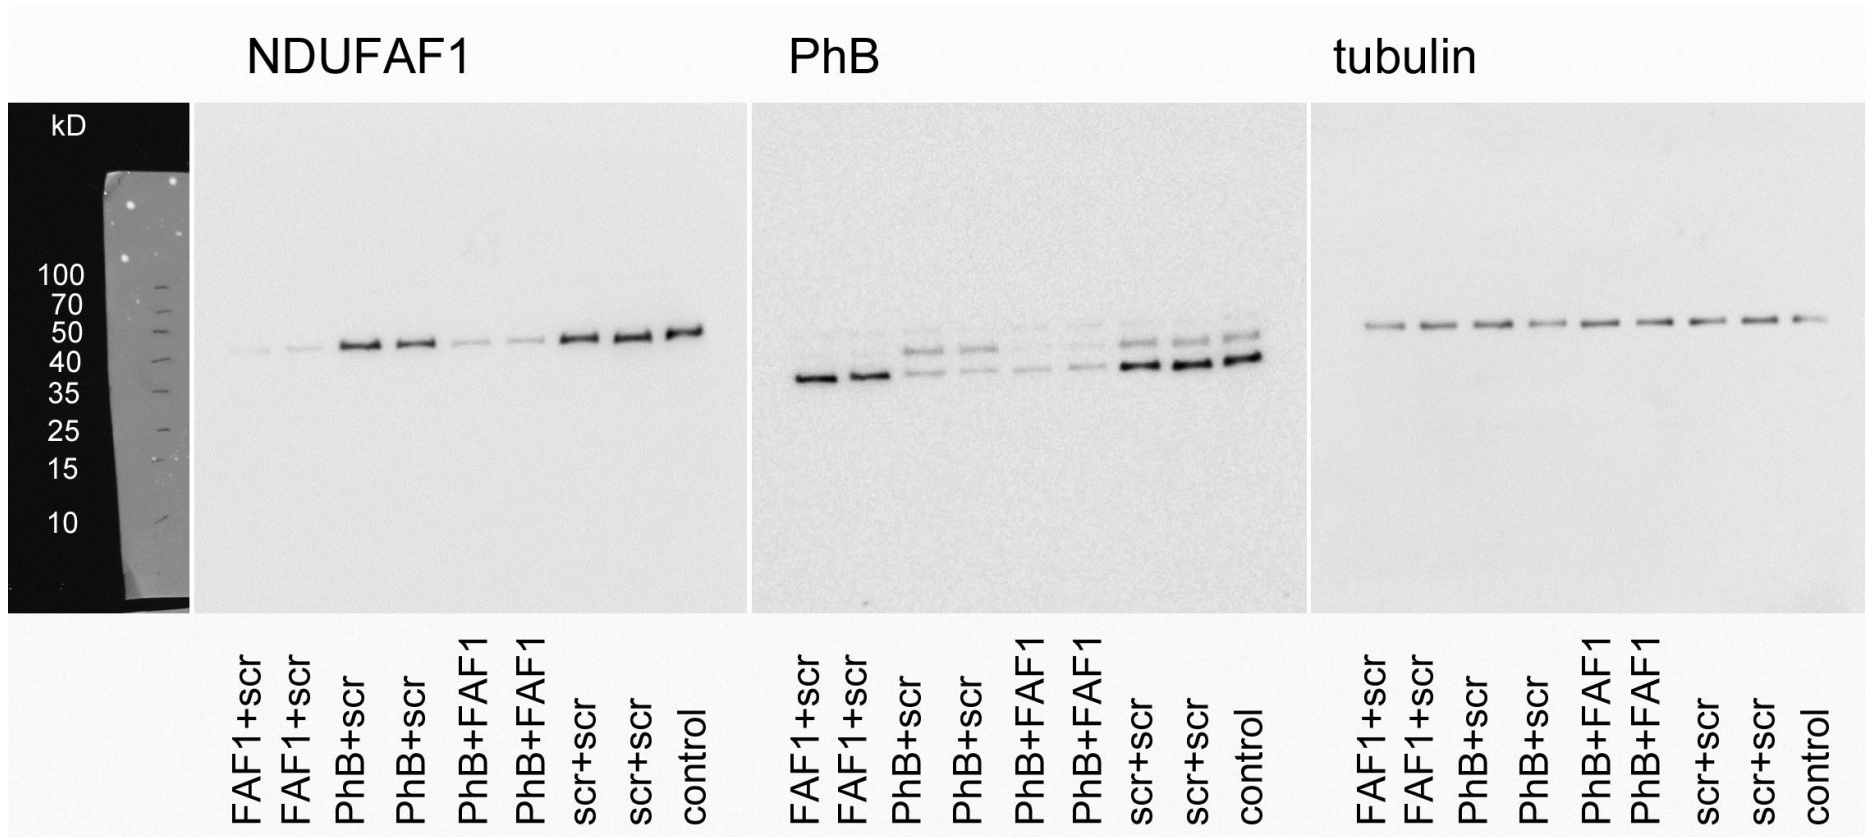

Supplementary Fig. 7: Full SDS-PAGE Western blots of complex I assembly factor NDUFAF1, prohibitin (phB) and tubulin following siRNA-mediated knock-down of the indicated mRNAs in HeLa cells.

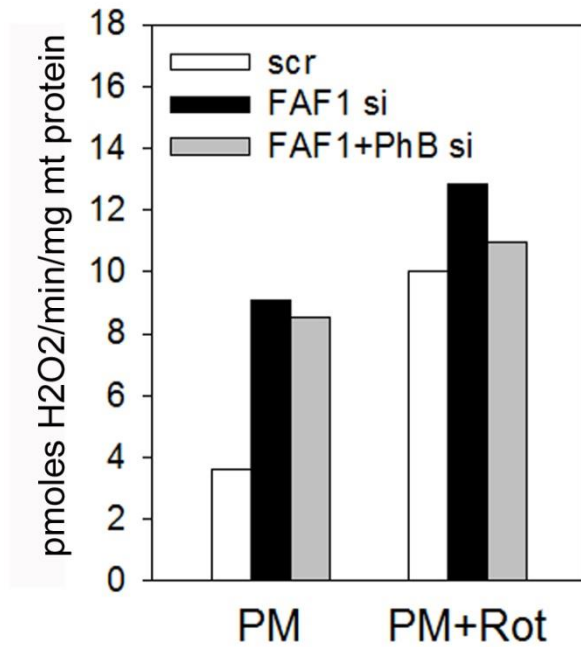

**Supplementary Fig. 8: Knock down of the mitochondrial chaperone prohibitin reduces hydrogen peroxide release triggered by suppression of the complex I assembly factor NDUFAF1.** H<sub>2</sub>O<sub>2</sub> release under pyruvate+malate (native conditions) and under PM + rotenone (CI max) in isolated HeLa cell mitochondria following transfection with the indicated siRNAs. Data are from a single experiment.



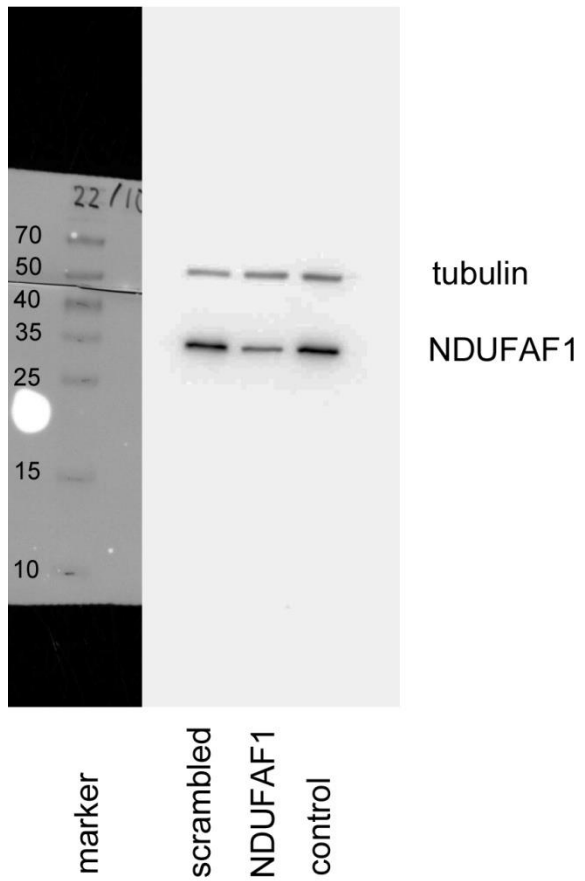

**Supplementary Fig. 9: Full SDS-PAGE Western blots of complex I assembly factor NDUFAF1 and tubulin following siRNA-mediated knock-down of the indicated mRNAs in MRC5 fibroblasts.**

**Supplementary Table 1. Proteins significantly changed in all three comparisons**

| Uniprot ID | Gene names | Protein names                                                                                              | DR -AL  |             | Old -Young |             | ICRFa -C57Bl/6 |             |
|------------|------------|------------------------------------------------------------------------------------------------------------|---------|-------------|------------|-------------|----------------|-------------|
|            |            |                                                                                                            | $\beta$ | Fold change | $\beta$    | Fold change | $\beta$        | Fold change |
| O35129     | Phb2       | Prohibitin-2 (B-cell receptor-associated protein BAP37)                                                    | 1       | -2.47       | 1          | 1.84        | 1              | -1.73       |
| P12787     | Cox5a      | Cytochrome c oxidase subunit 5A, mitochondrial (Cytochrome c oxidase polypeptide Va)                       | 1       | -3.17       | 1          | 2.11        | 1              | -2.19       |
| P51881     | Slc25a5    | ADP/ATP translocase 2 (Solute carrier family 25 member 5)                                                  | 1       | -1.84       | 1          | 2.25        | 1              | -1.52       |
| P67778     | Phb        | Prohibitin (B-cell receptor-associated protein 32)                                                         | 1       | -2.80       | 1          | 1.76        | 1              | -1.76       |
| Q6PF96     | Etfdh      | Electron transfer flavoprotein-ubiquinone oxidoreductase, mitochondrial                                    | 1       | -2.31       | 1          | 1.95        | 1              | -1.79       |
| Q9CR68     | Uqcrcs1    | Cytochrome b-c1 complex subunit Rieske, mitochondrial (Complex III subunit 5) (Rieske iron-sulfur protein) | 1       | -1.96       | 1          | 2.43        | 1              | -2.34       |
| B1ASE2     | Atp5h      | ATP synthase subunit d, mitochondrial                                                                      | 1       | -2.64       | 0.9998     | 2.08        | 0.646          | -1.45       |
| P56480     | Atp5b      | ATP synthase subunit beta,                                                                                 | 1       | -1.22       | 0.9922     | 1.19        | 1              | -1.93       |

|        |        |                                                                                       |        |       |        |       |       |       |
|--------|--------|---------------------------------------------------------------------------------------|--------|-------|--------|-------|-------|-------|
|        |        | mitochondrial                                                                         |        |       |        |       |       |       |
| Q9CZ13 | Uqcrc1 | Cytochrome b-c1 complex subunit 1, mitochondrial (Complex III subunit 1)              | 1      | -2.39 | 0.9034 | 1.49  | 1     | -1.59 |
| Q9DCT2 | Ndufs3 | NADH dehydrogenase [ubiquinone] iron-sulfur protein 3, mitochondrial (Complex I-30kD) | 1      | -2.29 | 0.7084 | 1.32  | 0.982 | -1.46 |
| Q62425 | Ndufa4 | NADH dehydrogenase [ubiquinone] 1 alpha subcomplex subunit 4                          | 0.998  | -2.06 | 0.8794 | 1.78  | 0.82  | -1.55 |
| Q99J99 | Mpst   | 3-mercaptopyruvate sulfurtransferase (MST) (EC 2.8.1.2)                               | 0.9676 | 1.34  | 1      | 1.66  | 1     | -1.54 |
| Q8BYC3 | Acox1  | Peroxisomal acyl-coenzyme A oxidase 1 (Palmitoyl-CoA oxidase)                         | 0.9655 | -1.32 | 0.9994 | -1.51 | 0.805 | -1.29 |

**Supplementary Tab 2. Mitochondria specific KEGG pathway enrichment analysis:** Pathways significantly ( $Q < 0.05$ ) enriched based on proteins that are more abundant in young C57Bl/6 under DR as compared to AL controls (more in DR). Q values for enrichment of the same pathways based on proteins more abundant in long-lived young ICRFa (centre) and on proteins less abundant in old ICRFa mice (right) are shown for comparison. No pathway (except the most general mmu01100) is consistently enriched in all three conditions.

| KEGG Metabolic pathway                              | Q-Values        |                     |                   |
|-----------------------------------------------------|-----------------|---------------------|-------------------|
|                                                     | more in DR      | more in young ICRFa | less in old ICRFa |
| mmu01100 Metabolism                                 | <b>0</b>        | <b>0</b>            | <b>0.041249</b>   |
| mmu00280 Valine, leucine and isoleucine degradation | <b>8.21E-22</b> | NA                  | NS0.137044        |
| mmu00410 beta-Alanine metabolism                    | <b>1.43E-17</b> | NA                  | NS 0.112764       |
| mmu00640 Propanoate metabolism                      | <b>1.49E-16</b> | NA                  | NS 0.136363       |
| mmu00020 Citrate (TCA) cycle                        | <b>3.64E-13</b> | NA                  | NA                |
| mmu00071 Fatty acid metabolism                      | <b>6.14E-11</b> | NA                  | <b>0.046149</b>   |
| mmu00650 Butanoate metabolism                       | <b>8.40E-11</b> | NA                  | NS 0.124042       |
| mmu00330 Arginine and proline metabolism            | <b>1.09E-10</b> | <b>0.000348</b>     | NA                |
| mmu00250 Alanine, aspartate                         | <b>4.84E-10</b> | <b>5.54E-05</b>     | NA                |

|                                                  |                 |                 |             |
|--------------------------------------------------|-----------------|-----------------|-------------|
| and glutamate metabolism                         |                 |                 |             |
| mmu00310 Lysine degradation                      | <b>6.26E-10</b> | NA              | NS0.145341  |
| mmu00620 Pyruvate metabolism                     | <b>4.68E-08</b> | NA              | NA          |
| mmu00010 Glycolysis / Gluconeogenesis            | <b>3.32E-07</b> | NA              | NS 0.160339 |
| mmu00380 Tryptophan metabolism                   | <b>3.83E-06</b> | NA              | NS 0.169911 |
| mmu00910 Nitrogen metabolism                     | <b>8.29E-06</b> | <b>0.001127</b> | NA          |
| mmu00340 Histidine metabolism                    | <b>8.22E-05</b> | NA              | NA          |
| mmu00561 Glycerolipid metabolism                 | <b>8.90E-05</b> | NA              | NA          |
| mmu00471 D-Glutamine and D-glutamate metabolism  | <b>0.000104</b> | NA              | NA          |
| mmu00630 Glyoxylate and dicarboxylate metabolism | <b>0.000168</b> | NA              | NA          |
| mmu00053 Ascorbate and aldarate metabolism       | <b>0.00018</b>  | NA              | NA          |
| mmu00062 Fatty acid                              | <b>0.000238</b> | <b>0.044435</b> | NA          |

|                                                      |                 |                |             |
|------------------------------------------------------|-----------------|----------------|-------------|
| elongation                                           |                 |                |             |
| mmu03320 PPAR signaling pathway                      | <b>0.002648</b> | NA             | NA          |
| mmu00300 Lysine biosynthesis                         | <b>0.003505</b> | <b>0.03399</b> | NA          |
| mmu00040 Pentose and glucuronate interconversions    | <b>0.004877</b> | NA             | NA          |
| mmu00260 Glycine, serine and threonine metabolism    | <b>0.009143</b> | NA             | NA          |
| mmu00290 Valine, leucine and isoleucine biosynthesis | <b>0.009433</b> | NA             | NA          |
| mmu04964 Proximal tubule bicarbonate reclamation     | <b>0.013225</b> | NA             | NA          |
| mmu04146 Peroxisome                                  | <b>0.019191</b> | NA             | NA          |
| mmu00480 Glutathione metabolism                      | <b>0.042182</b> | NS 0.077449    | NS 0.156108 |
| mmu01040 Biosynthesis of unsaturated fatty acids     | <b>0.048593</b> | NA             | NS 0.122241 |

NA: no proteins in the pathway, NS: not significant

**Supplementary Table 3. Mitochondria specific KEGG pathway enrichment analysis:** Pathways significantly ( $Q < 0.05$ ) enriched based on proteins that are less abundant in young C57Bl/6 under DR (left). Q values for enrichment of the same pathways based on proteins less abundant in long-lived young ICRFa mice (centre) and on proteins more abundant in old ICRFa mice (right) are also shown. Multiple pathways are enriched in all three conditions.

| KEGG Metabolic pathway                               | Q-Values        |                     |                   |
|------------------------------------------------------|-----------------|---------------------|-------------------|
|                                                      | less in DR      | less in young ICRFa | more in old ICRFa |
| mmu01100 Metabolism                                  | <b>0</b>        | <b>0</b>            | <b>0</b>          |
| mmu00190 Oxphos                                      | <b>1.55E-22</b> | <b>3.34E-12</b>     | <b>1.18E-11</b>   |
| mmu05012 Parkinson's disease                         | <b>2.76E-18</b> | <b>3.67E-12</b>     | <b>3.62E-13</b>   |
| mmu05016 Huntington's disease                        | <b>1.44E-17</b> | <b>1.05E-12</b>     | <b>8.12E-13</b>   |
| mmu05010 Alzheimer's disease                         | <b>4.07E-17</b> | <b>4.24E-12</b>     | <b>1.89E-10</b>   |
| mmu04146 Peroxisome                                  | <b>0.000815</b> | <b>0.009966</b>     | NA                |
| mmu04141 Protein processing in endoplasmic reticulum | <b>0.001745</b> | NA                  | NA                |
| mmu00120 Primary bile acid biosynthesis              | <b>0.010878</b> | NA                  | NA                |
| mmu00360 Phenylalanine metabolism                    | <b>0.029513</b> | NS 0.131602         | NS 0.114578       |
| mmu03320 PPAR signaling pathway                      | <b>0.043446</b> | NA                  | NS 0.225012       |

NA: no proteins in the pathway, NS: not significant









|        |          |    |    |  |  |    |    |    |  |  |    |  |
|--------|----------|----|----|--|--|----|----|----|--|--|----|--|
| NDUFB5 | 294 ± 7  | 17 |    |  |  |    |    |    |  |  |    |  |
| NDUFB6 | 407 ± 51 | 33 | 30 |  |  |    |    |    |  |  |    |  |
| NDUFB7 | 231 ± 15 |    | 13 |  |  |    |    |    |  |  |    |  |
| NDUFB8 | 571 ± 12 |    |    |  |  |    |    |    |  |  |    |  |
| NDUFB9 | 679 ± 60 |    |    |  |  |    |    |    |  |  |    |  |
| NDUFC2 | 243 ± 48 |    |    |  |  |    |    |    |  |  |    |  |
| NDUFS1 | 3722±390 | 17 |    |  |  | 19 |    |    |  |  |    |  |
| NDUFS2 | 1650±128 |    |    |  |  |    |    |    |  |  |    |  |
| NDUFS3 | 1158±128 | 17 |    |  |  |    | 16 |    |  |  |    |  |
| NDUFS4 | 191 ± 53 |    |    |  |  |    |    |    |  |  |    |  |
| NDUFS5 | 78 ± 16  |    |    |  |  |    |    |    |  |  |    |  |
| NDUFS7 | 599 ± 73 |    |    |  |  |    |    |    |  |  |    |  |
| NDUFS8 | 353±132  |    |    |  |  |    |    |    |  |  |    |  |
| NDUFV1 | 1566±193 | 34 |    |  |  |    |    |    |  |  |    |  |
| NDUFV2 | 250 ± 28 |    |    |  |  |    |    |    |  |  |    |  |
| PHB    | 140 ± 7  |    |    |  |  |    |    |    |  |  |    |  |
| PHB2   | 254 ± 67 |    |    |  |  |    |    | 18 |  |  | 29 |  |
